# Supplementary material
Source: Springer Nature journal article supplement (https://www.springermedizin.de/resource/supplementary/12865_2008_237_MOESM4_ESM.pdf/9427578)

**Lis1****Actin****DAPI****Merge****Control**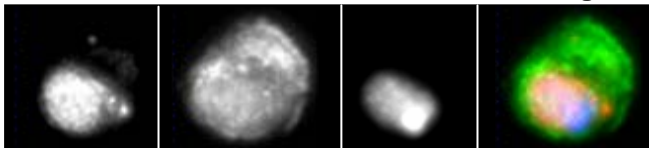***Hml-Gal4;*  
*UAS-Lis1<sup>IR</sup>***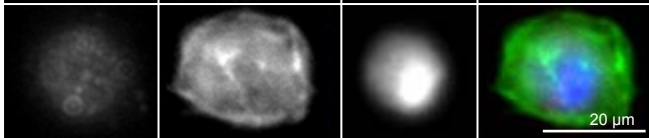**Red = Lis1 Green = Actin Blue = DAPI**

Supplement: MOESM4 [file 9427578]
